# Supplementary material for: Choosing a proper exchange–correlation functional for the computational catalysis on surface
Source: Royal Society of Chemistry journal article supplement (doi:10.1039/c4cp01868k), 2014-01-01
Supplement: c4cp01868k1.pdf [file c4cp01868k1.pdf]

Table S1 Tested results of cutoff energy, smearing width and  $k$ -point mesh by using  
CO at the top site of Co(0001)

| <b>Test of cutoff energy by RPBE functional</b> |              |
|-------------------------------------------------|--------------|
| <b>Cutoff energy</b>                            | <b>Eads</b>  |
| <b>350</b>                                      | <b>-1.36</b> |
| <b>400</b>                                      | <b>-1.37</b> |
| <b>450</b>                                      | <b>-1.37</b> |

  

| <b>Test of k points by RPBE functional</b> |              |
|--------------------------------------------|--------------|
| <b>k-point mesh</b>                        | <b>Eads</b>  |
| <b>3×3×1</b>                               | <b>-1.32</b> |
| <b>5×5×1</b>                               | <b>-1.37</b> |
| <b>7×7×1</b>                               | <b>-1.36</b> |

  

| <b>Test of smearing width by RPBE functional</b> |              |
|--------------------------------------------------|--------------|
| <b>0.05</b>                                      | <b>-1.37</b> |
| <b>0.1</b>                                       | <b>-1.37</b> |
| <b>0.2</b>                                       | <b>-1.35</b> |

Table S2 Comparison of adsorption energies (eV) and geometric parameters of CO on the one-side and two-side model by RPBE functional

| Configurations | Two-side model   |                  | One-side model   |                  |
|----------------|------------------|------------------|------------------|------------------|
|                | $E_{\text{ads}}$ | $d_{\text{C-O}}$ | $E_{\text{ads}}$ | $d_{\text{C-O}}$ |
| top            | -1.36            | 1.173            | -1.37            | 1.173            |
| fcc            | -1.29            | 1.198            | -1.27            | 1.199            |
| hcp            | -1.27            | 1.200            | -1.27            | 1.201            |
| bridge         | -1.23            | 1.192            | -1.23            | 1.194            |

Table S3  $\Delta H_{\text{cal}}$  (eV) of alkane, alkene and alkanol formation reactions calculated by 6-311+G(d,p) and cc-pVTZ basis sets, as well as phonon calculation using VASP code

|                                    | $\Delta H_{\text{cal}}$<br>6-<br>311+G(d,p) | $\Delta H_{\text{cal}}$<br>cc-pVTZ | $\Delta H_{\text{cal}}$<br>vasp | $\Delta H_{\text{exp}}$ |
|------------------------------------|---------------------------------------------|------------------------------------|---------------------------------|-------------------------|
| CH <sub>4</sub>                    | -2.17                                       | -2.12                              | -2.12                           | -2.14                   |
| C <sub>2</sub> H <sub>6</sub>      | -3.60                                       | -3.49                              | -3.42                           | -3.59                   |
| C <sub>3</sub> H <sub>8</sub>      | -5.10                                       | -4.96                              | -5.02                           | -5.16                   |
| C <sub>6</sub> H <sub>14</sub>     | -9.58                                       | -9.25                              | -9.46                           | -9.90                   |
| C <sub>10</sub> H <sub>22</sub>    | -15.56                                      | -15.03                             | -15.35                          | -16.19                  |
| C <sub>2</sub> H <sub>4</sub>      | -2.21                                       | -2.11                              | -2.21                           | -2.18                   |
| C <sub>3</sub> H <sub>6</sub>      | -3.87                                       | -3.74                              | -3.87                           | -3.87                   |
| C <sub>6</sub> H <sub>12</sub>     | -8.35                                       | -8.02                              | -8.25                           | -8.60                   |
| C <sub>10</sub> H <sub>20</sub>    | -14.33                                      | -13.78                             | -14.09                          | -14.90                  |
| CH <sub>3</sub> OH                 | -0.99                                       | -0.94                              | -0.97                           | -0.94                   |
| C <sub>2</sub> H <sub>5</sub> OH   | -2.65                                       | -2.59                              | -2.60                           | -2.65                   |
| C <sub>3</sub> H <sub>7</sub> OH   | -4.14                                       | -4.05                              | -4.07                           | -4.40                   |
| C <sub>6</sub> H <sub>13</sub> OH  | -8.62                                       | -8.34                              | -8.50                           | -8.93                   |
| C <sub>10</sub> H <sub>21</sub> OH | -14.60                                      | -14.09                             | -14.40                          | -15.11                  |

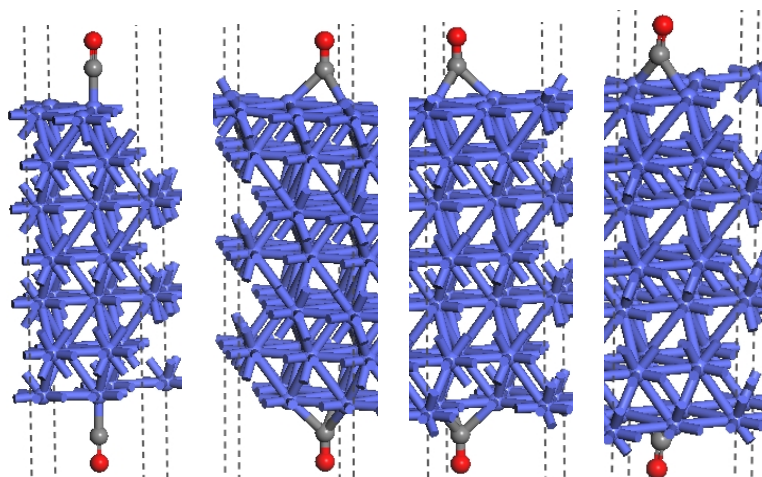

Fig. S1 CO adsorbed at the top, fcc, hcp and bridge sites of Co(0001)

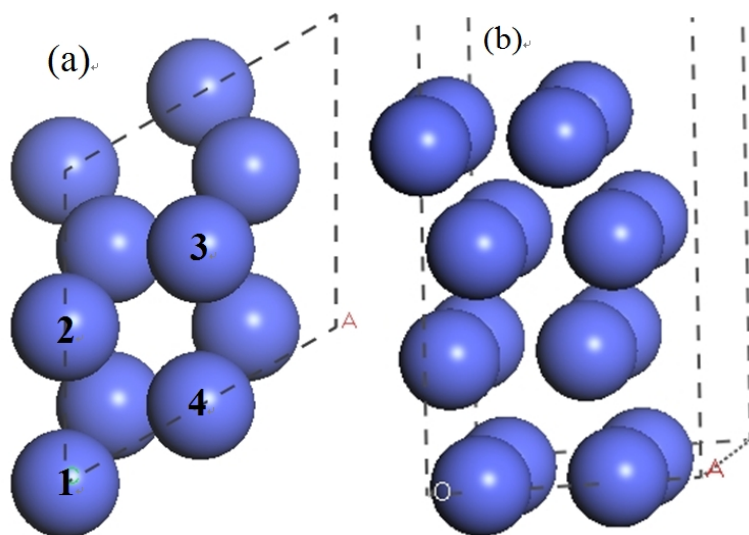

Fig. S2 Co(0001) slab model. (a) Topview, (b) Sideview
